# Supplementary material
Source: ML conference proceedings conference paper supplement (https://openaccess.thecvf.com/content/WACV2021/html/Dani_3DPoseLite_A_Compact_WACV_2021_paper.html)
Supplement: Supplementary file 1 [file Dani_3DPoseLite_A_Compact_WACV_2021_supplemental.zip]

# Supplementary Material

## 3DPoseLite: A Compact 3D Pose Estimation Using Node Embeddings

Meghal Dani  
TCS Research, New Delhi  
dani.meghal@tcs.com

Karan Narain  
TCS Research, New Delhi  
karan.narain@tcs.com

Ramya Hebbalaguppe  
TCS Research, New Delhi  
ramya.hebbalaguppe@tcs.com

### 1. Graphs Details

As discussed in the main article, we have voxelised and generated skeletons [2, 3] for each CAD model. These were used to identify and prune the nodes required for shape representation for each graph. Being invariant to euclidean transforms and computationally efficient, they form a suitable choice for 3D shape representation [4, 6]. These aid in reduction in training and inference time of neural networks. For better clarity, we present the details about graphs generated using Pascal3D Dataset [7]. As shown in Figure 2, the number of nodes in each graph per category (including all 12 classes) have been defined. It depends on the complexity of the CAD model and the skeleton obtained.

#### 1.1. Pix3D Dataset

Pix3D [5] is a recent dataset containing 5,711 non-occluded and non-truncated images of 395 CAD shapes among 9 categories including tool, wardrobe, desk, bed, chair, etc. It mainly features furniture, with a strong bias towards chairs. Figure 1 represents the skeleton and corresponding graphs obtained for a few categories. The objects are less complex as compared to Pascal3D [7].

### References

- [1] H Blum et al. A transformation for extracting new descriptors of shape. *Models for the perception of speech and visual form*, 19(5):362–380, 1967.
- [2] Philip Kollmannsberger, Michael Kerschnitzki, Felix Repp, Wolfgang Wagermaier, Richard Weinkamer, and Peter Fratzl. The small world of osteocytes: connectomics of the lacuno-canalicular network in bone. *New Journal of Physics*, 19(7):073019, 2017.
- [3] Ta-Chih Lee, Rangasami L Kashyap, and Chong-Nam Chu. Building skeleton models via 3-d medial surface axis thinning algorithms. *CVGIP: Graphical Models and Image Processing*, 56(6):462–478, 1994.
- [4] Mattia Natali, Silvia Biasotti, Giuseppe Patanè, and Bianca Falcidieno. Graph-based representations of point clouds. *Graphical Models*, 73(5):151–164, 2011.

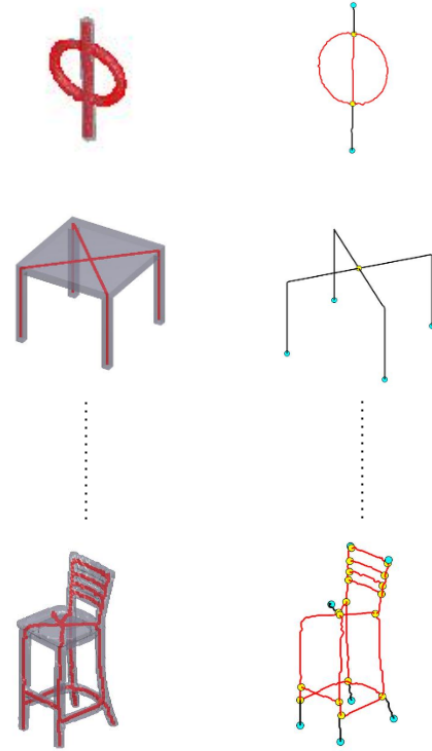

Figure 1. Illustration of skeletons generated from CAD models in Pix3D dataset [5] (in grey) using prairie-fire analogy [1] and their respective graphs on the right. The blue nodes represent the leaf nodes, yellow denote the non-leaf nodes and edges are represented in red color. (best viewed in color)

- [5] Xingyuan Sun, Jiajun Wu, Xiuming Zhang, Zhoutong Zhang, Chengkai Zhang, Tianfan Xue, Joshua B Tenenbaum, and William T Freeman. Pix3d: Dataset and methods for single-image 3d shape modeling. In *Proceedings of the IEEE Conference on Computer Vision and Pattern Recognition*, pages 2974–2983, 2018.
- [6] Andrea Tagliasacchi, Thomas Delame, Michela Spagnuolo, Nina Amenta, and Alexandru Telea. 3d skeletons: A state-

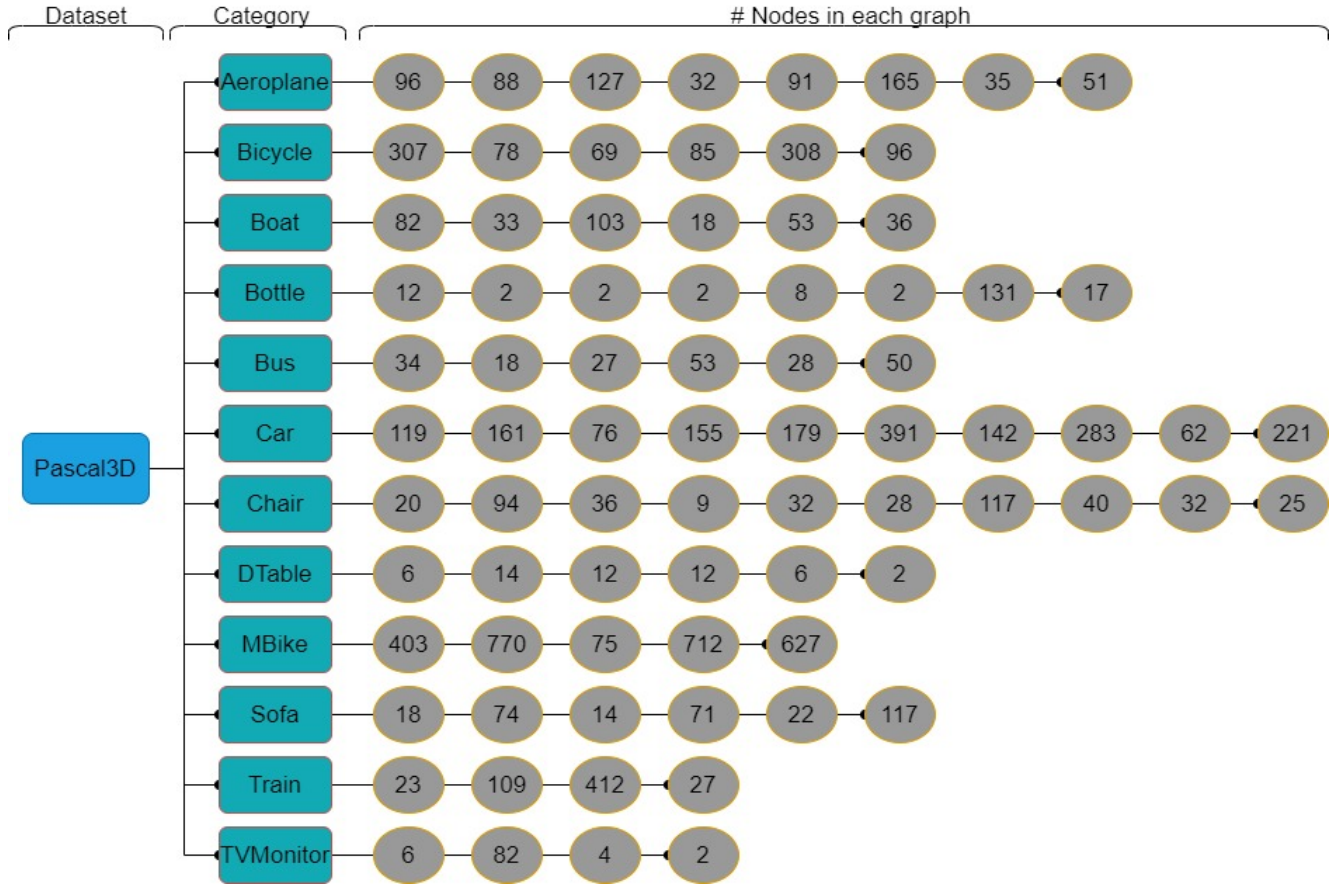

Figure 2. Hierarchical representation of Number of Nodes(in gray) in graphs of each category (in green) for Pascal3D dataset.

of-the-art report. In *Computer Graphics Forum*, volume 35, pages 573–597. Wiley Online Library, 2016.

- [7] Yu Xiang, Roozbeh Mottaghi, and Silvio Savarese. Beyond pascal: A benchmark for 3d object detection in the wild. In *IEEE winter conference on applications of computer vision*, pages 75–82. IEEE, 2014.
